# Supplementary material
Source: ML conference proceedings conference paper supplement (https://proceedings.mlr.press/v119/pokutta20a.html)
Supplement: Supplementary file [file pokutta20a-supp.pdf]

---

# Supplementary Material for “On the Unreasonable Effectiveness of the Greedy Algorithm: Greedy Adapts to Sharpness”

---

Sebastian Pokutta<sup>1</sup> Mohit Singh<sup>2</sup> Alfredo Torrico<sup>3</sup>

## A. Appendix

### A.1. Remaining Proofs for Submodular Sharpness

*Proof of Theorem 3.* Let us denote by  $S_i := \{e_1, \dots, e_i\}$  the set we obtain in the  $i$ -th iteration of Algorithm 1 and  $S_0 = \emptyset$ . Note that  $S^g := S_k$ . Since the greedy algorithm chooses the element with the largest marginal in each iteration, then for all  $i \in [k]$  we have

$$f(S_i) - f(S_{i-1}) \geq \max_{e \in S^* \setminus S_{i-1}} f_{S_{i-1}}(e)$$

Now, from the submodular sharpness condition we conclude that

$$f(S_i) - f(S_{i-1}) \geq \frac{[f(S^*) - f(S_{i-1})]^{1-\theta} f(S^*)^\theta}{kc}.$$

The rest of the proof is the same as the proof of Theorem 1, which gives us the desired result.  $\square$

Finally, we prove the main result for the concept of dynamic submodular sharpness. This proof is similar to the proof of Theorem 2.

*Proof of Theorem 4.* For each iteration  $i \in [k]$  in the greedy algorithm we have

$$f(S_i) - f(S_{i-1}) \geq \max_{e \in S^* \setminus S_{i-1}} f_{S_{i-1}}(e)$$

Now, from the dynamic submodular sharpness condition we conclude that

$$f(S_i) - f(S_{i-1}) \geq \frac{[f(S^*) - f(S_{i-1})]^{1-\theta_{i-1}} f(S^*)^{\theta_{i-1}}}{kc_{i-1}},$$

which gives the same recurrence than Theorem 2. The rest of the proof is the same as the proof of Theorem 2.  $\square$

<sup>1</sup>Zuse Institute Berlin (ZIB), TU Berlin <sup>2</sup>Georgia Institute of Technology <sup>3</sup>CERC Data Science, Polytechnique Montreal. Correspondence to: Alfredo Torrico <alfredo.torricopalacios@polymtl.ca>.

### A.2. Remaining Lemmata

**Lemma 1.** Consider any monotone set function  $f : 2^V \rightarrow \mathbb{R}_+$ . Then,

1. There is always a set of parameters  $c$  and  $\theta$  such that  $f$  is  $(c, \theta)$ -monotonic sharp. In particular,  $f$  is always  $(c, \theta)$ -monotonic sharp when both  $c \rightarrow 1$  and  $\theta \rightarrow 0$ .
2. If  $f$  is  $(c, \theta)$ -monotonic sharp, then for any  $c' \geq c$  and  $\theta' \leq \theta$ ,  $f$  is  $(c', \theta')$ -monotonic sharp. Therefore, in order to maximize the guarantee of Theorem 1 we look for the smallest feasible  $c$  and the largest feasible  $\theta$ .
3. If  $f$  is also submodular, then Inequality (3) needs to be checked only for sets of size exactly  $k$ .

*Proof.* 1. Note that  $\frac{|S^* \setminus S|}{k} \leq 1$ , so  $\left(\frac{|S^* \setminus S|}{k \cdot c}\right)^{\frac{1}{\theta}} \leq \left(\frac{1}{c}\right)^{\frac{1}{\theta}}$ ,

which shows that  $\left(\frac{|S^* \setminus S|}{k \cdot c}\right)^{\frac{1}{\theta}} \rightarrow 0$  when  $c \rightarrow 1$  and  $\theta \rightarrow 0$ . Therefore, Definition 1 is simply  $\sum_{e \in S^* \setminus S} f_S(e) \geq 0$ , which is satisfied since from monotonicity we have  $f_S(e) \geq 0$ .

2. Observe that  $\left(\frac{|S^* \setminus S|}{k \cdot c}\right)^{\frac{1}{\theta}}$  as a function of  $c$  and  $\theta$  is increasing in  $\theta$  and decreasing in  $c$ . Therefore,  $\left(\frac{|S^* \setminus S|}{k \cdot c}\right)^{\frac{1}{\theta}} \geq \left(\frac{|S^* \setminus S|}{k \cdot c'}\right)^{\frac{1}{\theta'}}$  for  $c' \geq c$  and  $\theta' \leq \theta$ .
3. Consider a set  $S$  with  $i$  elements and such that  $|S^* \setminus S| = \ell$ . Let us add  $k - i$  elements to  $S$  that do not belong to  $S^*$  and denote this set  $S'$ . The new set  $S'$  satisfies  $|S^* \setminus S'| = \ell$ ,  $|S'| = k$  and from submodularity we have  $f_S(e) \geq f_{S'}(e)$ . This proves that the inequality can be checked only for sets of size  $k$ .  $\square$

**Lemma 2.** Consider any monotone submodular set function  $f : 2^V \rightarrow \mathbb{R}_+$ . Then,

1. There is always a set of parameters  $c$  and  $\theta$  such that  $f$  is  $(c, \theta)$ -submodular sharp. In particular,  $f$  is always  $(c, \theta)$ -submodular sharp when both  $c \rightarrow 1$  and  $\theta \rightarrow 0$ .

2. If  $f$  is  $(c, \theta)$ -submodular sharp, then for any  $c' \geq c$  and  $\theta' \leq \theta$ ,  $f$  is  $(c', \theta')$ -submodular sharp. Therefore, in order to maximize the guarantee of Theorem 3 we look for the smallest feasible  $c$  and the largest feasible  $\theta$ .

3. Definition 1 implies Definition 3.

*Proof.* 1. Note that  $f$  satisfies the following sequence of inequalities for any set  $S$ :

$$\begin{aligned} \max_{e \in S^* \setminus S} f_S(e) &\geq \frac{\sum_{e \in S^* \setminus S} f_S(e)}{|S^* \setminus S|} \\ &\geq \frac{f(S \cup S^*) - f(S)}{k} \\ &\geq \frac{f(S^*) - f(S)}{k} \end{aligned} \quad (11)$$

where the second inequality is because of submodularity and in the last inequality we applied monotonicity. Observe that (11) is exactly (4) for  $c = 1$  and  $\theta \rightarrow 0$ .

2. Observe that  $\frac{[f(S^*) - f(S)]^{1-\theta} f(S^*)^\theta}{k \cdot c}$  as a function of  $c$  and  $\theta$  is increasing in  $\theta$  and decreasing in  $c$ . Therefore,  $\frac{[f(S^*) - f(S)]^{1-\theta} f(S^*)^\theta}{k \cdot c} \geq \frac{[f(S^*) - f(S)]^{1-\theta'} f(S^*)^{\theta'}}{k \cdot c'}$  for  $c' \geq c$  and  $\theta' \leq \theta$ .

3. Definition 1 implies that

$$\frac{\sum_{e \in S^* \setminus S} f_S(e)}{|S^* \setminus S|} \geq \frac{\left[ \sum_{e \in S^* \setminus S} f_S(e) \right]^{1-\theta} f(S^*)^\theta}{k c}. \quad (12)$$

On the other hand, by using submodularity and monotonicity we get

$$\sum_{e \in S^* \setminus S} f_S(e) \geq f(S^* \cup S) - f(S) \geq f(S^*) - f(S).$$

Therefore, by using (12) we obtain

$$\begin{aligned} \max_{e \in S^* \setminus S} f_S(e) &\geq \frac{\sum_{e \in S^* \setminus S} f_S(e)}{|S^* \setminus S|} \\ &\geq \frac{[f(S^*) - f(S)]^{1-\theta} f(S^*)^\theta}{k c}, \end{aligned}$$

which proves the desired result.  $\square$

### A.3. Analysis of Monotonic Sharpness for Specific Classes of Functions

Let us denote by  $\mathcal{S}(f)$  the sharpness feasible region for  $f$ , i.e.,  $f$  is  $(c, \theta)$ -monotonic sharp if, and only, if  $(c, \theta) \in \mathcal{S}(f)$ . We focus now on obtaining the best approximation guarantee for a monotone submodular function with sharpness region  $\mathcal{S}(f)$ .

**Proposition 1.** Given a non-negative monotone submodular function  $f : 2^V \rightarrow \mathbb{R}_+$  with sharpness region  $\mathcal{S}(f)$ , then the highest approximation guarantee  $1 - \left(1 - \frac{\theta}{c}\right)^{\frac{1}{\theta}}$  for Problem (P<sub>1</sub>) is given by a pair of parameters that lies on the boundary of  $\mathcal{S}(f)$ .

*Proof.* Fix an optimal solution  $S^*$  for Problem (P<sub>1</sub>). Note that we can compute the best pair  $(c, \theta)$  for that  $S^*$  by solving the following optimization problem

$$\begin{aligned} \max \quad & 1 - \left(1 - \frac{\theta}{c}\right)^{\frac{1}{\theta}} \\ \text{s.t.} \quad & (c, \theta) \in \mathcal{S}(f, S^*), \end{aligned} \quad (13)$$

where  $\mathcal{S}(f, S^*)$  corresponds to the sharpness region related to  $S^*$ . Observe that function  $1 - \left(1 - \frac{\theta}{c}\right)^{\frac{1}{\theta}}$  is continuous and convex in  $[1, \infty) \times (0, 1]$ . Note that for any  $c \geq 1$ , if  $\theta \rightarrow 0$ , then  $\left(1 - \frac{\theta}{c}\right)^{\frac{1}{\theta}} \rightarrow e^{-1/c}$ . Also, for any subset  $S$ , Inequality (3) is equivalent to

$$\frac{|S^* \setminus S|}{k} \cdot \left( \frac{\sum_{e \in S^* \setminus S} f_S(e)}{\text{OPT}} \right)^{-\theta} - c \leq 0$$

where the left-hand side is convex as a function of  $c$  and  $\theta$ , hence  $\mathcal{S}(f, S^*)$  is a convex region. Therefore, the optimal pair  $(c^*, \theta^*)$  of Problem (13) lies on the boundary of  $\mathcal{S}(f, S^*)$ . Since we considered an arbitrary optimal set, then the result easily follows.  $\square$

Let us study  $\mathcal{S}(f)$  for general monotone submodular functions. If we fix  $|S^* \setminus S|$ , the right-hand side of (3) does not depend explicitly on  $S$ . On the other hand, for a fixed size  $|S^* \setminus S|$ , there is a subset  $S^\ell$  that minimizes the left-hand side of (3), namely

$$\sum_{e \in S^* \setminus S} f_S(e) \geq \sum_{e \in S^* \setminus S^\ell} f_{S^\ell}(e),$$

for all feasible subset  $S$  such that  $|S^* \setminus S| = \ell$ . For each  $\ell \in [k]$ , let us denote

$$W(\ell) := \sum_{e \in S^* \setminus S^\ell} f_{S^\ell}(e).$$

Therefore, instead of checking Inequality (3) for all feasible subsets, we only need to check  $k$  inequalities defined by  $W(1), \dots, W(k)$ . In general, computing  $W(\ell)$  is difficult since we require access to  $S^*$ . However, for very small instances or specific classes of functions, this computation can be done efficiently. In the following, we provide a detailed analysis of the sharpness feasible region for specific classes of functions.

## A.3.1. LINEAR FUNCTIONS.

Consider weights  $w_e > 0$  for each element  $e \in V$  and function  $f(S) = \sum_{e \in S} w_e$ . Let us order elements by weight as follows  $w_1 \geq w_2 \geq \dots \geq w_n$ , where element  $e_i$  has weight  $w_i$ . We observe that an optimal set  $S^*$  for Problem (P<sub>1</sub>) is formed by the top- $k$  weighted elements and  $\text{OPT} = \sum_{i \in [k]} w_i$ .

**Proposition 2** (Linear functions). *Consider weights  $w_1 \geq w_2 \geq \dots \geq w_n > 0$ , where element  $e_i \in V$  has weight  $w_i$ , and denote  $W(\ell) := \sum_{i=k-\ell+1}^k w_i$  for each  $\ell \in \{1, \dots, k\}$ . Then, the linear function  $f(S) = \sum_{i: e_i \in S} w_i$  is  $(c, \theta)$ -monotonic sharp in*

$$\left\{ (c, \theta) \in [1, \infty) \times [0, 1] : \right. \\ \left. c \geq \frac{\ell}{k} \cdot \left( \frac{W(\ell)}{W(k)} \right)^{-\theta}, \quad \forall \ell \in [k-1] \right\}.$$

Moreover, this region has only  $k-1$  constraints.

*Proof.* First, observe that  $W(k) = \text{OPT}$ . Note that for any subset we have  $|S^* \setminus S| \in \{1, \dots, k\}$  (for  $|S^* \setminus S| = 0$  the sharpness inequality is trivially satisfied). Given  $\ell \in \{1, \dots, k\}$ , pick any feasible set such that  $|S^* \setminus S| = \ell$ , then the sharpness inequality corresponds to

$$\sum_{e \in S^* \setminus S} w_e \geq \left( \frac{\ell}{k \cdot c} \right)^{\frac{1}{\theta}} \cdot W(k), \quad (14)$$

where the left-hand side is due to linearity. Fix  $\ell \in \{1, \dots, k\}$ , we observe that the lowest possible value for the left-hand side in (14) is when  $S^* \setminus S = \{e_{k-\ell+1}, \dots, e_k\}$ . Therefore, for a linear function, Definition 1 is equivalent to

$$\frac{W(\ell)}{W(k)} \geq \left( \frac{\ell}{k \cdot c} \right)^{\frac{1}{\theta}}, \quad \ell \in \{1, \dots, k\} \Leftrightarrow \\ c \geq \frac{\ell}{k} \cdot \left( \frac{W(\ell)}{W(k)} \right)^{-\theta}, \quad \ell \in \{1, \dots, k\}.$$

Note that  $\ell = k$  is redundant with  $c \geq 1$ . Given this, we have  $k-1$  curves that define a feasible region in which the linear function is  $(c, \theta)$ -monotonic sharp. In particular, if we consider  $c = 1$ , then we can pick  $\theta = \min_{\ell \in [k-1]} \left\{ \frac{\log(k/\ell)}{\log(W(k)/W(\ell))} \right\}$ .  $\square$

From Proposition 2 we observe that the sharpness of the function depends exclusively on  $w_1, \dots, w_k$ . Moreover, the weights' magnitude directly affects the sharpness parameters. Let us analyze this: assume without loss of generality that  $\frac{w_k}{W(k)} \leq \frac{1}{k}$ , and more generally,  $\frac{W(\ell)}{W(k)} \leq \frac{\ell}{k}$  for all

$\ell \in [k-1]$ , so we have

$$\left( \frac{\ell}{k \cdot c} \right)^{\frac{1}{\theta}} \leq \frac{W(\ell)}{W(k)} \leq \frac{\ell}{k}, \quad \ell \in \{1, \dots, k\}$$

This shows that a sharp linear function has more similar weights in its optimal solution, i.e., when the weights in the optimal solution are *balanced*. We have the following facts for  $\epsilon \in (0, 1)$ :

- If  $\frac{w_k}{W(k)} = (1-\epsilon) \cdot \frac{1}{k}$ , then  $\frac{W(\ell)}{W(k)} \geq (1-\epsilon) \cdot \frac{\ell}{k}$  for every  $\ell \in [k-1]$ . Observe that  $c = \frac{1}{1-\epsilon}$  and  $\theta = 1$  satisfy  $(1-\epsilon) \cdot \frac{\ell}{k} \geq \left( \frac{\ell}{k \cdot c} \right)^{\frac{1}{\theta}}$  for any  $\ell \in [k-1]$ , showing that  $f$  is  $\left( \frac{1}{1-\epsilon}, 1 \right)$ -sharp. More importantly, when  $\epsilon$  is small the function becomes sharper. Also, if we set  $c = 1$ , then from the analysis of Proposition 2 we could pick

$$\theta = \min_{\ell \in [k-1]} \left\{ \frac{\log(k/\ell)}{\log(W(k)/W(\ell))} \right\} \\ \geq \min_{\ell \in [k-1]} \left\{ \frac{\log \frac{k}{\ell}}{\log \frac{k}{\ell(1-\epsilon)}} \right\} = \frac{\log k}{\log \frac{k}{(1-\epsilon)}},$$

showing that  $f$  is  $(1, \Omega(\frac{\log k}{\log(k/(1-\epsilon))}))$ -sharp. Again, when  $\epsilon \rightarrow 0$  the function becomes sharper.

- On the other hand, suppose that  $\frac{w_2}{W(k)} = \frac{\epsilon}{k}$ , then  $\frac{W(\ell)}{W(k)} \leq \epsilon \cdot \frac{\ell}{k}$  for every  $\ell \in [k-1]$ . Similarly to the previous bullet, by setting  $c = 1$  we can choose

$$\theta = \min_{\ell \in [k-1]} \left\{ \frac{\log(k/\ell)}{\log(W(k)/W(\ell))} \right\} \\ \leq \min_{\ell \in [k-1]} \left\{ \frac{\log \frac{k}{\ell}}{\log \frac{k}{\ell \epsilon}} \right\} = \frac{\log k}{\log \frac{k}{\epsilon}},$$

showing that  $f$  is  $(1, O(\frac{\log k}{\log(k/\epsilon)}))$ -sharp. Observe that when  $\epsilon \rightarrow 0$  the function becomes less sharp.

**Observation 1.** *Given parameters  $c \geq 1$  and  $\theta \in [0, 1]$ , it is easy to construct a linear function that is  $(c, \theta)$ -sharp by using Proposition 2. Without loss of generality assume  $W(k) = 1$ . From constraint  $\ell = 1$  choose  $w_k = \left( \frac{1}{kc} \right)^{\frac{1}{\theta}}$ , and more generally, from constraint  $\ell \in [k-1]$  choose  $w_{k-\ell+1} = \left( \frac{\ell}{kc} \right)^{\frac{1}{\theta}} - \sum_{i=k-\ell+2}^k w_i$ . Finally, set  $w_1 = 1 - \sum_{i=2}^k w_i$ .*

**Observation 2.** *Given  $\beta \in [0, 1]$ , there exists a linear function  $f$  and parameters  $(c, \theta) \in [1, \infty) \times [0, 1]$  such that  $f$  is  $(c, \theta)$ -sharp and  $1 - \left(1 - \frac{\theta}{c}\right)^{\frac{1}{\theta}} \geq 1 - \beta$ . To obtain this, we use Observation 1 with  $c = 1$  and any  $\theta \in [0, 1]$  such that  $\beta \geq (1 - \theta)^{1/\theta}$ .*

## A.3.2. CONCAVE OVER MODULAR FUNCTIONS.

In this section, we will study a generalization of linear functions. Consider weights  $w_e > 0$  for each element  $e \in V$ , a parameter  $\alpha \in [0, 1]$  and function  $f(S) = (\sum_{e \in S} w_e)^\alpha$ . Observe that the linear case corresponds to  $\alpha = 1$ . Let us order elements by weight as follows  $w_1 \geq w_2 \geq \dots \geq w_n$ , where element  $e_i$  has weight  $w_i$ . Similarly than the linear case, we note that an optimal set  $S^*$  for Problem (P<sub>1</sub>) is formed by the top- $k$  weighted elements and  $\text{OPT} = (\sum_{i \in [k]} w_i)^\alpha$ .

**Proposition 3** (Concave over modular functions). *Consider weights  $w_1 \geq w_2 \geq \dots \geq w_n > 0$ , where element  $e_i \in V$  has weight  $w_i$  and parameter  $\alpha \in [0, 1]$ . Denote*

$$W(\ell) := \sum_{i=k-\ell+1}^k \left[ \left( \sum_{j=k+1}^{k+\ell} w_j + \sum_{j=1}^{k-\ell} w_j + w_i \right)^\alpha - \left( \sum_{j=k+1}^{k+\ell} w_j + \sum_{j=1}^{k-\ell} w_j \right)^\alpha \right]$$

for each  $\ell \in \{1, \dots, k\}$ . Then, the function  $f(S) = (\sum_{i: e_i \in S} w_i)^\alpha$  is  $(c, \theta)$ -monotonic sharp in

$$\left\{ (c, \theta) \in [1, \infty) \times [0, 1] : c \geq \frac{\ell}{k} \cdot \left( \frac{W(\ell)}{\text{OPT}} \right)^{-\theta}, \forall \ell \in [k] \right\}.$$

*Proof.* First, observe that unlike the linear case,  $W(k) \neq \text{OPT}$ . Given  $\ell \in \{1, \dots, k\}$ , pick any feasible set such that  $|S^* \setminus S| = \ell$ , then the sharpness inequality corresponds to

$$\begin{aligned} \sum_{e \in S^* \setminus S} \left( \sum_{e' \in S} w_{e'} + w_e \right)^\alpha - \left( \sum_{e' \in S} w_{e'} \right)^\alpha \\ \geq \left( \frac{\ell}{k \cdot c} \right)^{\frac{1}{\alpha}} \cdot \text{OPT}. \end{aligned} \quad (15)$$

Observe that function  $(x + y)^\alpha - x^\alpha$  is increasing in  $y$  and decreasing in  $x$ . Therefore, the lowest possible value for the left-hand side in (15) is when  $\sum_{e' \in S} w_{e'}$  is maximized and  $w_e$  is minimized. Given this, for each  $\ell \in \{1, \dots, k\}$  we choose  $S = \{e_1, \dots, e_{k-\ell}, e_{k+1}, \dots, e_{k+\ell}\}$ . In this way, we get  $S^* \setminus S = \{e_{k-\ell+1}, \dots, e_k\}$ , whose elements have the lowest weights, and  $S$  has the highest weight possible in  $V \setminus \{e_{k-\ell+1}, \dots, e_k\}$ . Hence, Definition 1 is equivalent to

$$\begin{aligned} \frac{W(\ell)}{\text{OPT}} &\geq \left( \frac{\ell}{k \cdot c} \right)^{\frac{1}{\alpha}}, \quad \ell \in [k] \Leftrightarrow \\ c &\geq \frac{\ell}{k} \cdot \left( \frac{W(\ell)}{\text{OPT}} \right)^{-\theta}, \quad \ell \in [k]. \end{aligned}$$

We have  $k$  curves that define a feasible region in which the function is  $(c, \theta)$ -monotonic sharp with respect to  $S^*$ .

In particular, if we consider  $c = 1$ , then we can pick  $\theta = \min_{\ell \in [k]} \left\{ \frac{\log(k/\ell)}{\log(\text{OPT}/W(\ell))} \right\}$ .  $\square$

## A.3.3. COVERAGE FUNCTION, (NEMHAUSER &amp; WOLSEY, 1978).

Consider the space  $\mathcal{X} = \{1, \dots, k\}^k$ , sets  $A_i = \{x \in \mathcal{X} : x_i = 1\}$  for  $i \in [k-1]$  and  $B_i = \{x \in \mathcal{X} : x_k = i\}$  for  $i \in [k]$ , ground set  $V = \{A_1, \dots, A_{k-1}, B_1, \dots, B_k\}$ , and function  $f(S) = |\bigcup_{U \in S} U|$  for  $S \subseteq V$ . In this case, Problem (P<sub>1</sub>) corresponds to finding a family of  $k$  elements in  $V$  that covers  $\mathcal{X}$  the most. By simply counting, we can see that the optimal solution for Problem (P<sub>1</sub>) is  $S^* = \{B_1, \dots, B_k\}$  and  $\text{OPT} = k^k$ . As shown in (Nemhauser & Wolsey, 1978), the greedy algorithm achieves the best possible  $1 - 1/e$  guarantee for this problem.

**Proposition 4.** *Consider ground set  $V = \{A_1, \dots, A_{k-1}, B_1, \dots, B_k\}$ . Then, the function  $f(S) = |\bigcup_{U \in S} U|$  is  $(c, \theta)$ -sharp in*

$$\left\{ (c, \theta) \in [1, \infty) \times [0, 1] : \right. \\ \left. c \geq \frac{\ell}{k} \cdot \left( \frac{\ell}{k} \cdot \left( \frac{k-1}{k} \right)^\ell \right)^{-\theta}, \quad \forall \ell \in [k-1] \right\}.$$

*Proof.* First, note that any family of the form  $\{A_{i_1}, \dots, A_{i_\ell}, B_{j_1}, \dots, B_{j_{k-\ell}}\}$  covers the same number of points for  $\ell \in [k-1]$ . Second, since there are only  $k-1$  sets  $A_i$ , then any subset  $S \subseteq V$  of size  $k$  satisfies  $|S^* \setminus S| \leq k-1$ . By simply counting, for  $\ell \in [k-1]$  and set  $S$  such that  $|S^* \setminus S| = \ell$ , we have

$$\begin{aligned} f(S) &= k^k - \ell k^{k-\ell-1} (k-1)^\ell, \\ f(S+e) &= k^k - (\ell-1) k^{k-\ell-1} (k-1)^\ell. \end{aligned}$$

Then, (3) becomes

$$\frac{\ell}{k} \cdot \left( \frac{k-1}{k} \right)^\ell \geq \left( \frac{\ell}{k} \right)^{\frac{1}{\alpha}}$$

Observe that  $f$  is  $(1, \frac{1}{k})$ -sharp since  $\ell \leq k-1$  and  $\left( \frac{k-1}{k} \right)^\ell \geq \left( \frac{\ell}{k} \right)^{k-1}$ .  $\square$

**Observation 3** (Coverage function, (Nemhauser & Wolsey, 1978)). *Note that in order to achieve  $1 - (1 - \frac{\theta}{c})^{\frac{1}{\alpha}} \geq 1 - e^{-1}$ , we need  $\theta \in [0, 1]$  and  $1 \leq c \leq \frac{\theta}{1 - e^{-\theta}}$ . On the other hand, by taking  $\ell = k-1$  in Proposition 4 we have  $c \geq \left( \frac{k-1}{k} \right)^{-k\theta+1}$ , where the right-hand side tends to  $e^\theta$  when  $k$  is sufficiently large. Therefore, for  $k$  sufficiently large we have  $e^\theta \leq c \leq \frac{\theta}{1 - e^{-\theta}}$ , whose only feasible point is  $c = 1$  and  $\theta \rightarrow 0$ .*
